# Supplementary material
Source: publisher figshare collection journal article supplement (https://asha.figshare.com/ndownloader/files/22184721)

# Research Needed to Treat Acquired Central Auditory Processing Disorder (CAPD) in Service Members and Veterans

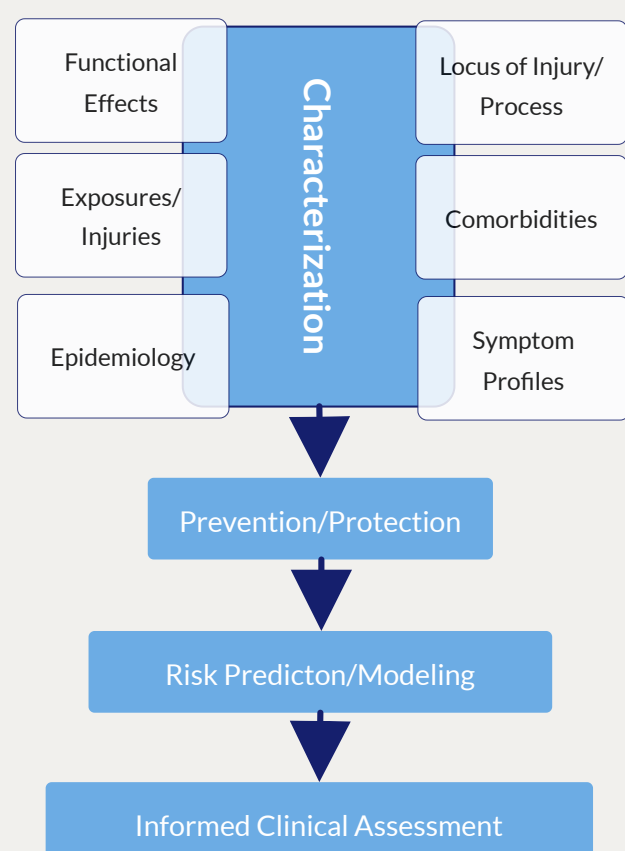

## Characterization of acquired CAPD in service members and veterans:

Research into capabilities to **prevent, protect, predict, model, and experimentally assess** military acquired CAPD will improve the selection and accuracy of **clinical assessment strategies**, and inform the development of evidence-based educational materials and courses.

## Assessment of acquired CAPD in service members and veterans:

Research into capabilities to **screen, differentially diagnose, and evaluate** military acquired CAPD will support the development and selection of **treatment and rehabilitative strategies**, and help to document and explain **risk factors, comorbidities, symptom profiles, trajectories, and outcomes**.

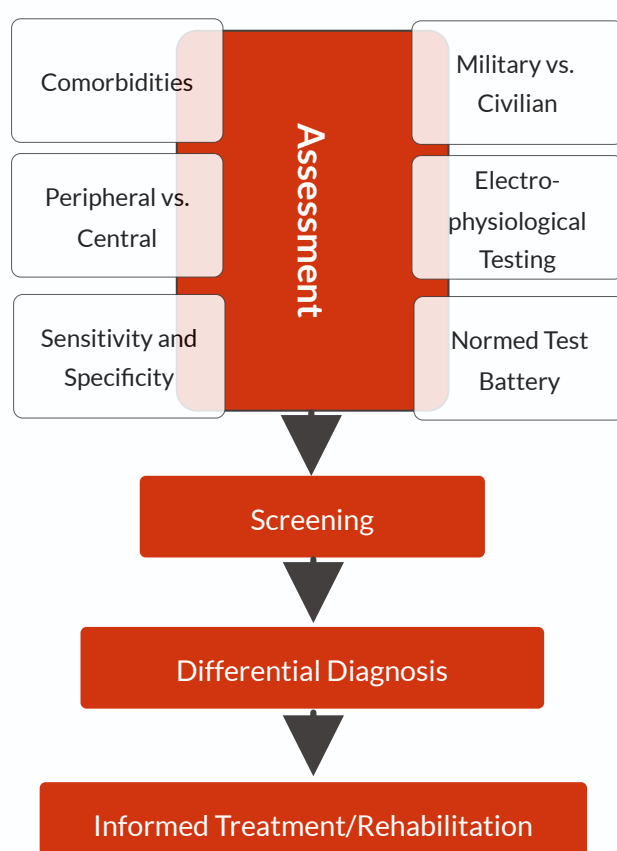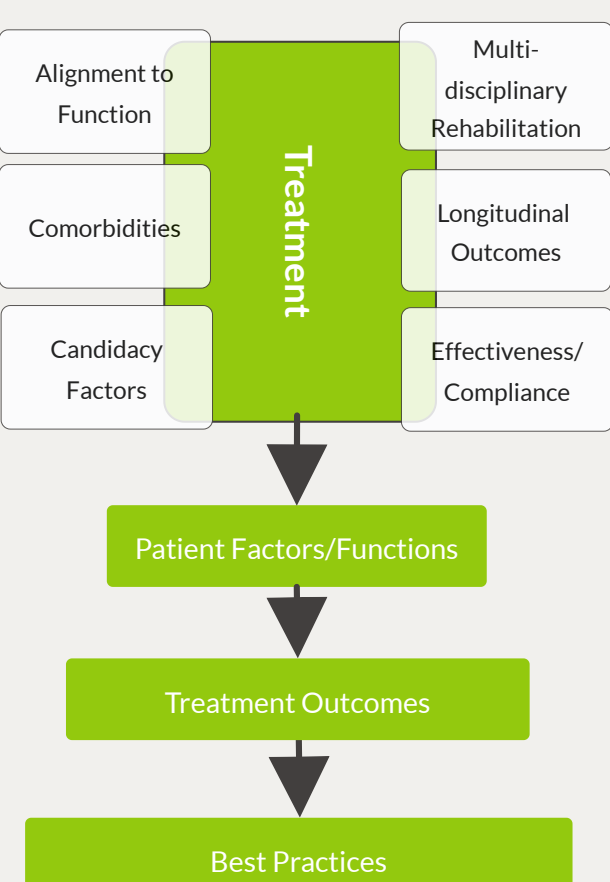

## Treatment and rehabilitation of acquired CAPD in service members and veterans:

Research into capabilities to **effectively treat and rehabilitate** military acquired CAPD will improve our understanding of **comorbid factors, functional deficits, and symptom profiles** that may be unique to military exposure.

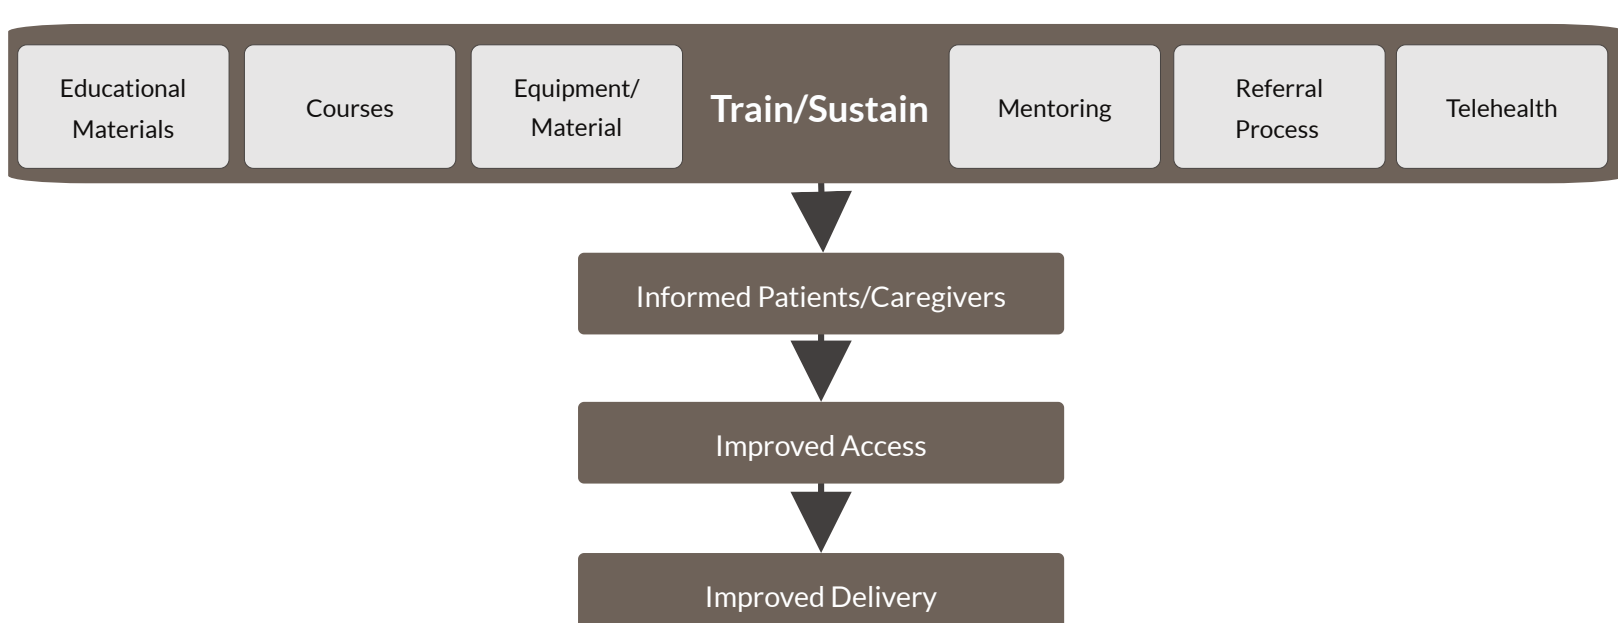

## Training and sustaining DoD and VA clinicians and patients:

Research into capabilities to effectively train clinicians and educate patients, and **improve care access and delivery**, will **improve assessment/diagnostic efficacy** and **patient outcomes**.

Objectives combine to build a solution-driven model of research and development needed for treatment and rehabilitation of acquired CAPD

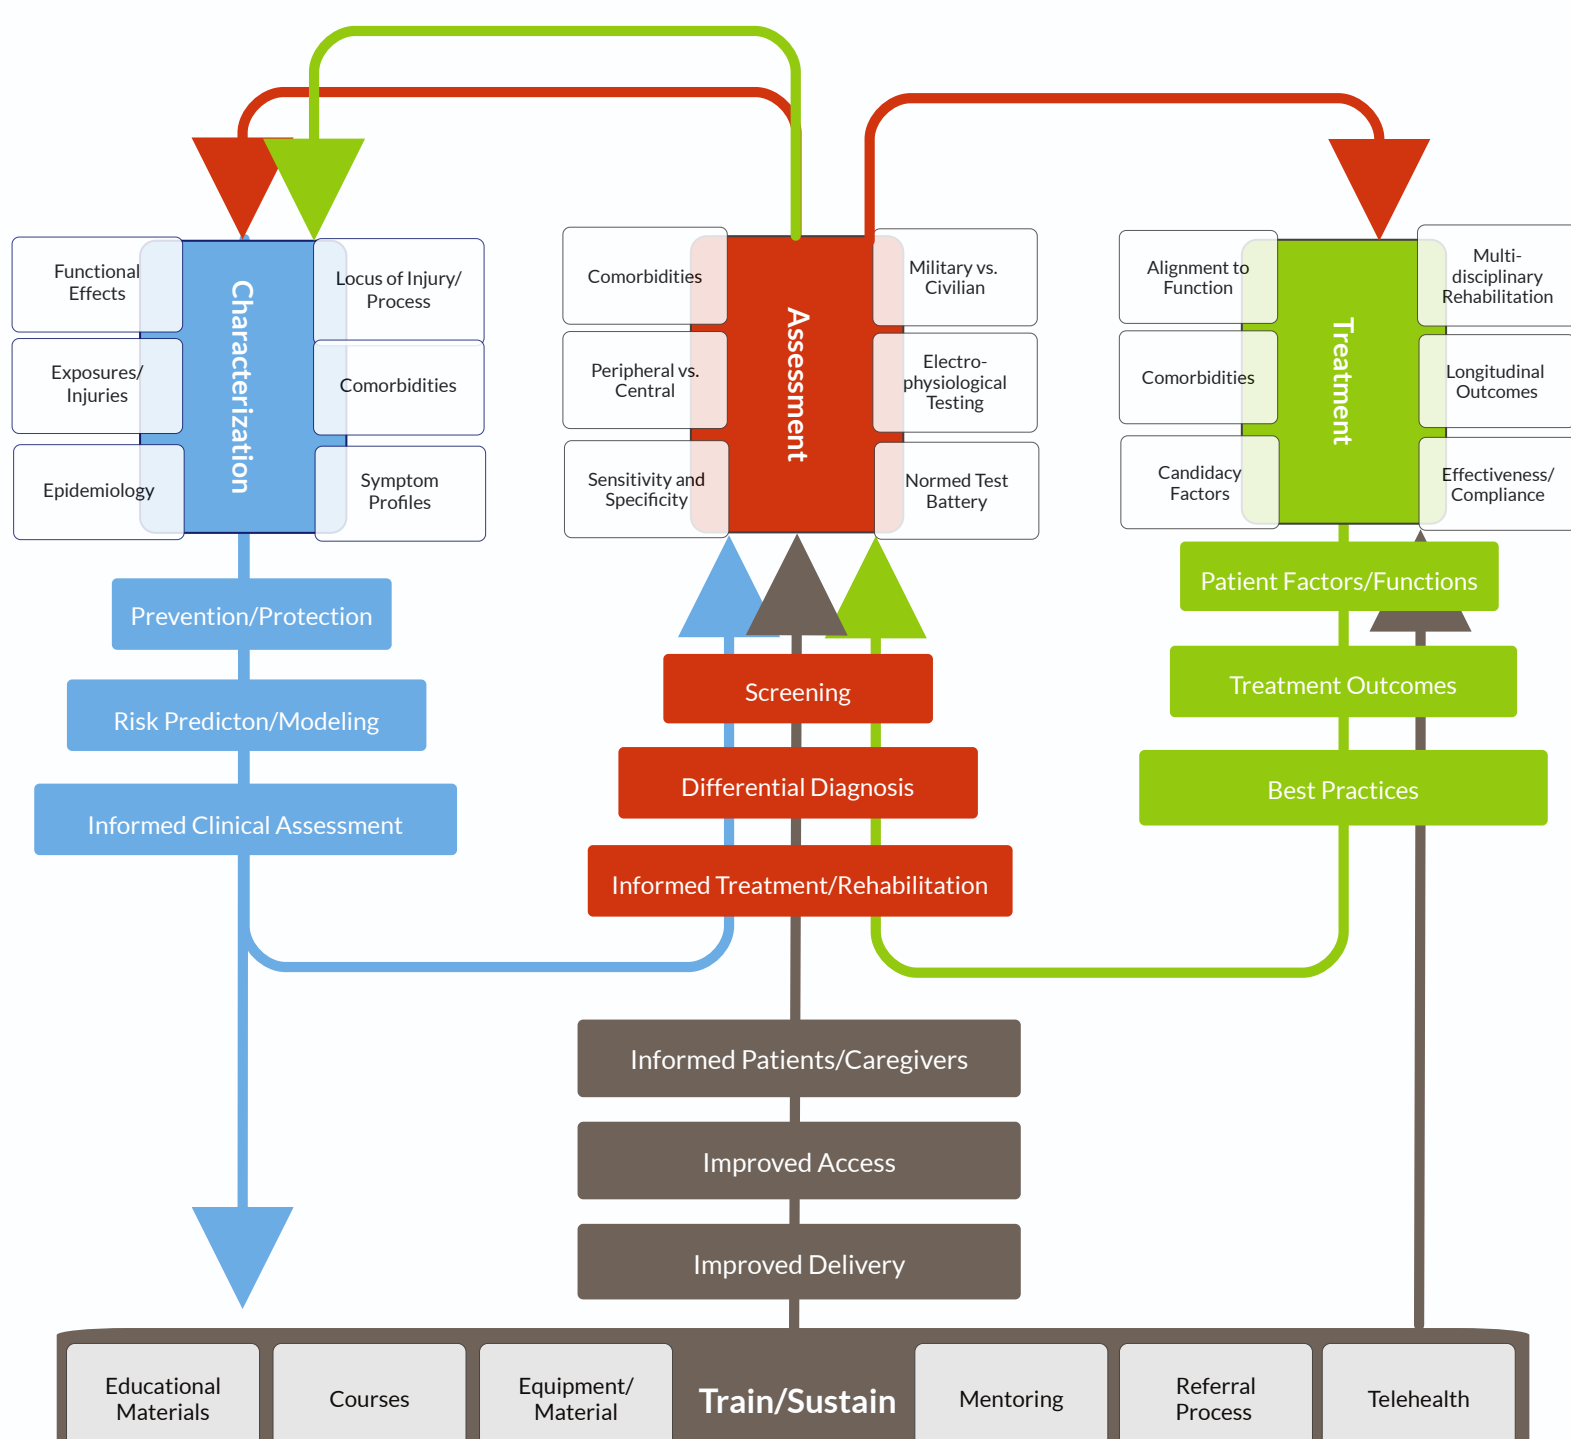

Supplement: Supplementary file 1 [file 22184721]
